# Supplementary material for: Semi-Quantitative Multiplex Profiling of the Complement System Identifies Associations of Complement Proteins with Genetic Variants and Metabolites in Age-Related Macular Degeneration
Source: MDPI journal article supplement (doi:10.3390/jpm11121256), 2021-11-25

Supplementary Figure 4. Factor I (FI) levels show significant differences between genotype groups of rs10033900 and p.Leu131Arg rare variant at the CFI locus. Red indicates homozygous AMD-risk increasing genotype, while blue shows the homozygous AMD protective genotype, and yellow indicates the heterozygous genotype. Kruskal Wallis test was included to test if there was a difference between the three genotype groups, where possible. Medians of two genotype groups were compared with the Mann Whitney-U test. Showing the distribution of peptide levels in light/heavy (L/H) in blood plasma for A) FI peptide #43 (HGNTDSEGIVEVK), stratified by rs10033900 genotype at the CFI locus; B) FI peptide #43 (HGNTDSEGIVEVK), stratified by CFI p.Leu131Arg genotype; C) FI peptide #43 (HGNTDSEGIVEVK), stratified by CFI p.Arg406His genotype; D) FI peptide #43 (HGNTDSEGIVEVK), stratified by CFI p.Pro553Ser genotype.

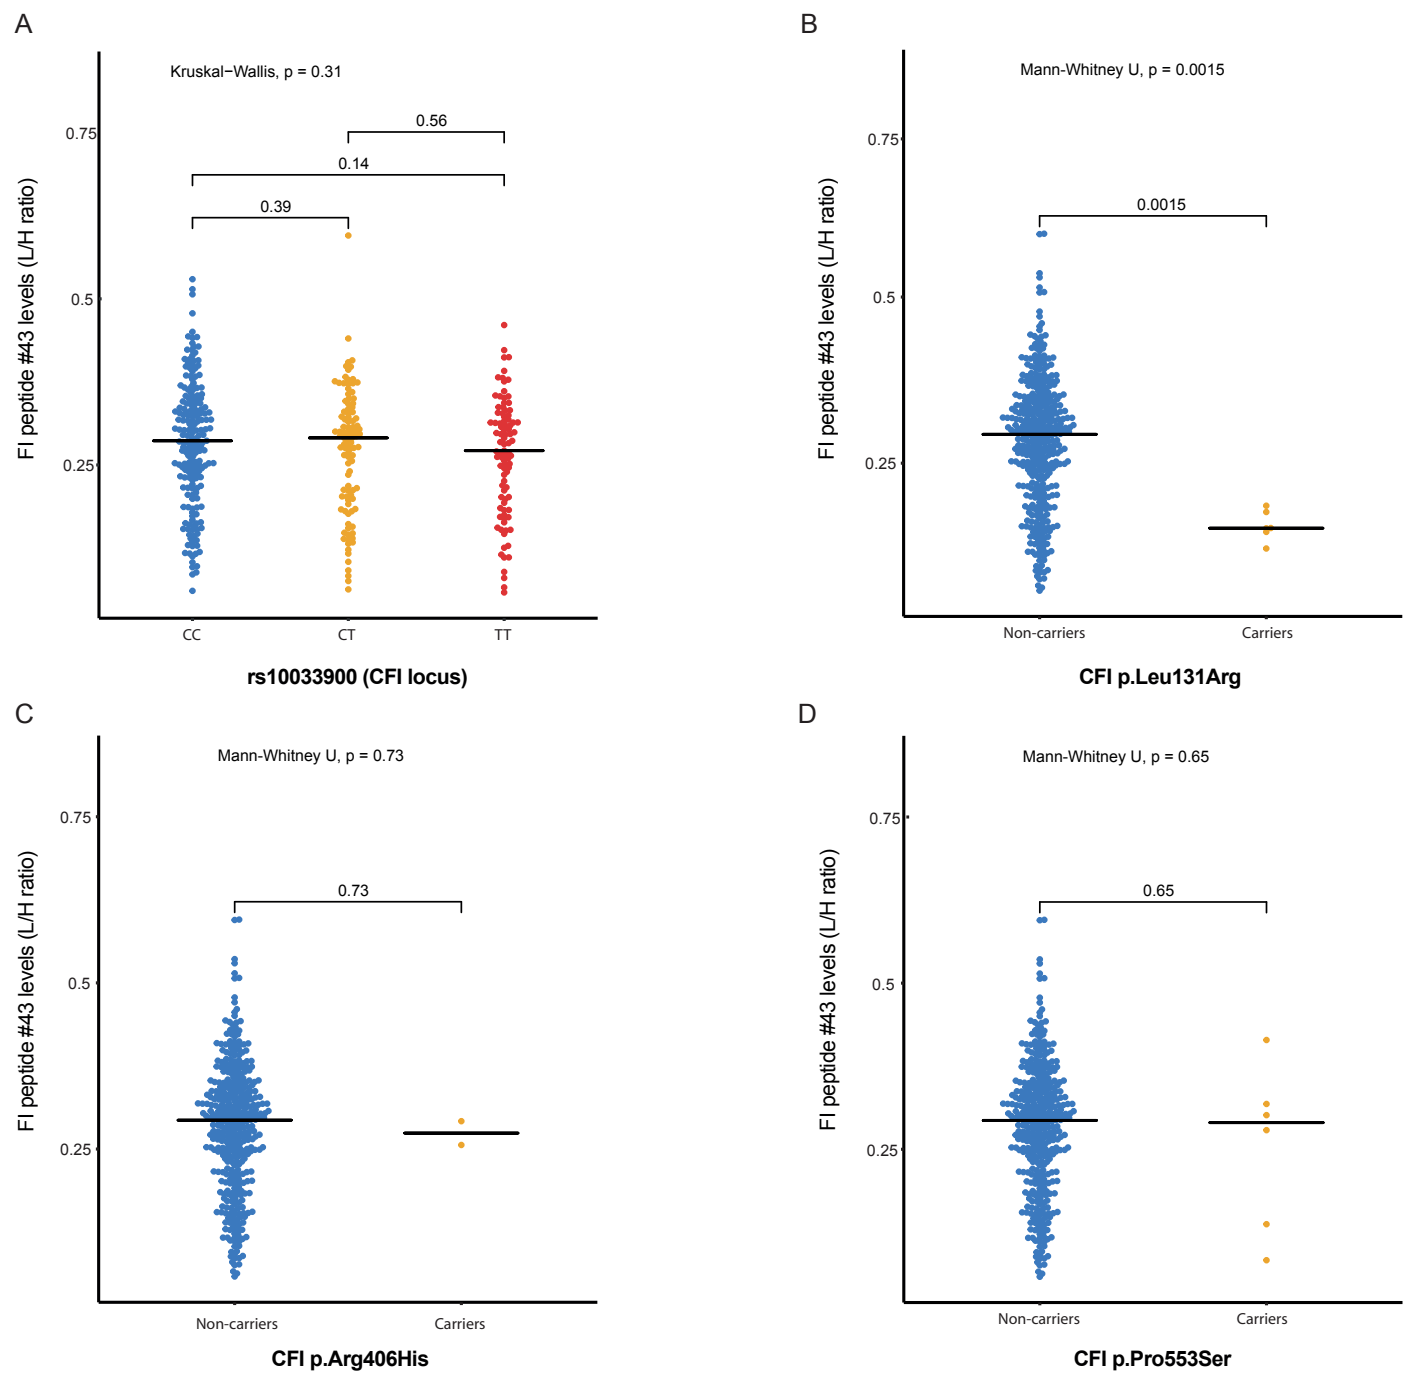

Supplement: s1 [file s1]
