# Supplementary material for: Semi-Quantitative Multiplex Profiling of the Complement System Identifies Associations of Complement Proteins with Genetic Variants and Metabolites in Age-Related Macular Degeneration
Source: MDPI journal article supplement (doi:10.3390/jpm11121256), 2021-11-25

Supplementary figure 3. Factor B (FB) peptide levels show significant differences between genotype groups of AMD-associated variants at the C2/CFB/SKIV2L locus. Red indicates homozygous AMD-risk increasing genotype and yellow indicates the heterozygous genotype. Medians of two genotype groups were compared with the Mann Whitney-U test. A) FB peptide #36 (STGSWSTLK), stratified by rs4151667 genotype at the C2/CFB/SKIV2L locus; B) FB peptide #37 (YGLVTYATYPK), stratified by rs4151667 genotype at the C2/CFB/SKIV2L locus; C) FB peptide #38 (DAQYAPGYDK), stratified by rs4151667 genotype at the C2/CFB/SKIV2L locus

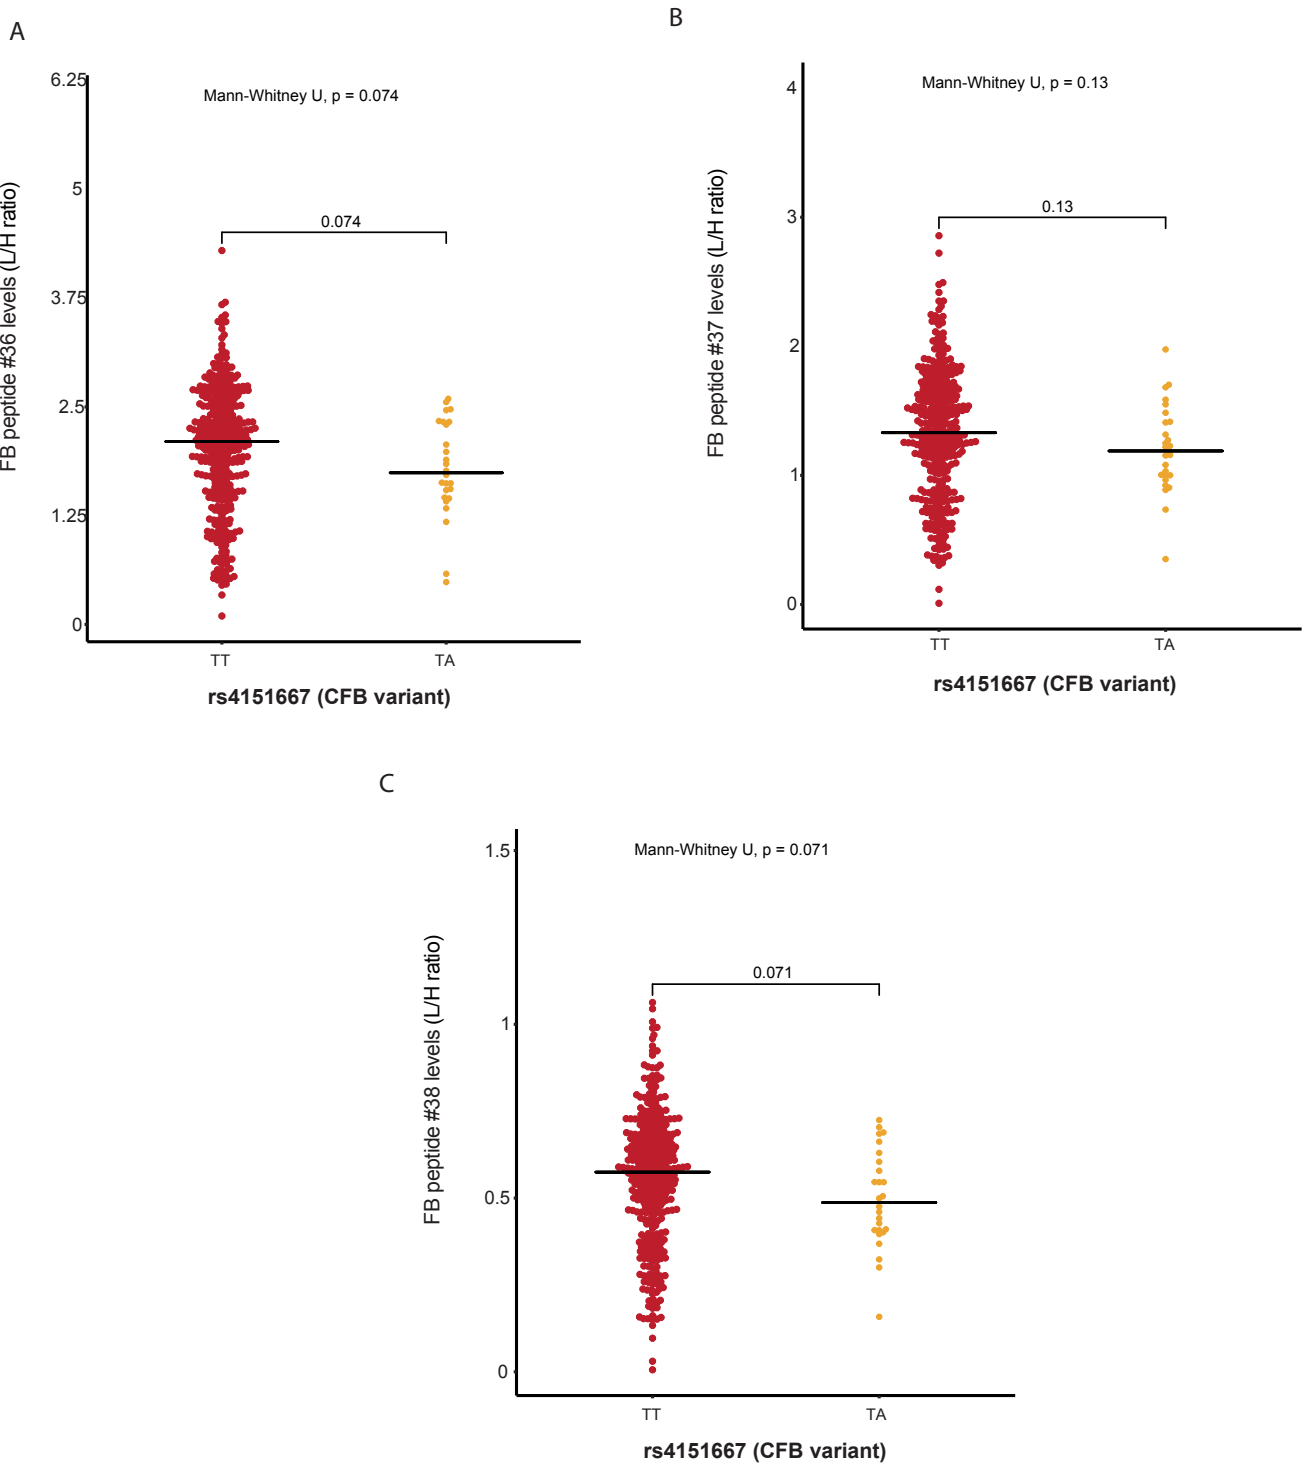

Supplement: s1 [file s1]
