# Supplementary material for: Semi-Quantitative Multiplex Profiling of the Complement System Identifies Associations of Complement Proteins with Genetic Variants and Metabolites in Age-Related Macular Degeneration
Source: J Pers Med. 2021 Nov 25;11(12):1256. doi: 10.3390/jpm11121256 (PMC8705464; doi:10.3390/jpm11121256)
Supplement: Supplementary file 1 [file jpm-11-01256-s001.zip]

Archive with 5 entries (5 files):
- SupplementaryFigureS1.pdf
- SupplementaryFigureS2.pdf
- SupplementaryFigureS3.pdf
- SupplementaryFigureS4.pdf
- SupplementaryTables.xlsx
