# Supplementary material for: Semi-Quantitative Multiplex Profiling of the Complement System Identifies Associations of Complement Proteins with Genetic Variants and Metabolites in Age-Related Macular Degeneration
Source: J Pers Med. 2021 Nov 25;11(12):1256. doi: 10.3390/jpm11121256 (PMC8705464; doi:10.3390/jpm11121256)
Supplement: Supplementary file 1 [file jpm-11-01256-s001.zip › SupplementaryTables.xlsx]

## Sheet: Supplementary Table S1
Supplementary Table S1. Peptides of the complement system analyzed in the multiplex selected reaction monitoring liquid chromatography-mass spectrometry assay
Peptide id	Peptide sequence	Protein	Protein accession (UniprotKB)*	Subunit	Selected fragments	Complement pathway	Chromosome	Expression (Bgee database)^	Conc internal standard (nmol/l)	N of samples succesfully measured
1	SLGFCDTTNK	C1QA	sp|P02745|C1QA_HUMAN	subunit A	y6, y8	Classical	1	209 organs, highest in spleen	245.72	476
2	FDHVITNMNNNYEPR	C1QB	sp|P02746|C1QB_HUMAN	subunit B	y3, y4	Classical	1	208 organs, highest in spleen	772.202	476
3	GNLCVNLMR	C1QB	sp|P02746|C1QB_HUMAN	subunit B	y6, y7	Classical	1	208 organs, highest in spleen	n/a	476
4	FQSVFTVTR	C1QC	sp|P02747|C1QC_HUMAN	subunit C	y5, y7	Classical	1	191 organs, highest in synovial tissue (joint fluid membrane)	n/a	476
5	TNQVNSGGVLLR	C1QC	sp|P02747|C1QC_HUMAN	subunit C	y8, y9	Classical	1	191 organs, highest in synovial tissue (joint fluid membrane)	837.038	476
6	YTTTMGVNTYK	C1R	sp|P00736|C1R_HUMAN	heavy chain	y6, y9	Classical	12	221 organs, highest in liver	73.1513	476
7	GYGFYTK	C1R	sp|P00736|C1R_HUMAN	light chain	b2, y5	Classical	12	221 organs, highest in liver	n/a	476
8	IIGGSDADIK	C1S	sp|P09871|C1S_HUMAN	light chain	y7, y8	Classical	12	230 organs, highest in liver	743.586	476
9	TNFDNDIALVR	C1S	sp|P09871|C1S_HUMAN	light chain	y8, y9	Classical	12	230 organs, highest in liver	n/a	476
10	VLMSVLNDNSR	C2	sp|P06681|CO2_HUMAN	C2a	y6, y8	Classical/Lectin	6	96 organs, highest in right lobe liver	n/a	470
11	SSGQWQTPGATR	C2	sp|P06681|CO2_HUMAN	C2b	y5, y6	Classical/Lectin	6	96 organs, highest in right lobe liver	842.55	476
12	TGLQEVEVK	C3	sp|P01024|CO3_HUMAN	C3b	y5, y6	Classical/Lectin/Alternative	19	228 organs, highest in parietal pleura (lung)	409.84	476
13	ILLQGTPVAQMTEDAVDAER	C3	sp|P01024|CO3_HUMAN	C3g	y4, y7	Classical/Lectin/Alternative	19	228 organs, highest in parietal pleura (lung)	1389.98	476
14	DFALLSLQVPLK	C4	sp|P0C0L5-1/2|CO4_HUMAN	beta chain	y3, y7	Classical/Lectin	6	88 organs, highest in right lobe liver	n/a	476
15	VDFTLSSER	C4	sp|P0C0L5-1/2|CO4_HUMAN	beta chain	y4, y5	Classical/Lectin	6	88 organs, highest in right lobe liver	503.922	476
16	VGDTLNLNLR	C4	sp|P0C0L5-1/2|CO4_HUMAN	beta chain	y5, y6	Classical/Lectin	6	88 organs, highest in right lobe liver	n/a	476
17	SHALQLNNR	C4	sp|P0C0L5-1/2|CO4_HUMAN	C4b	y6, y7	Classical/Lectin	6	88 organs, highest in right lobe liver	839.345	476
18	IDTQDIEASHYR	C5	sp|P01031|CO5_HUMAN	alpha' chain	y6, y10	Classical/Lectin/Alternative/Extrinsic	9	197 organs, highest in liver	n/a	476
19	ELSYYSLEDLNNK	C5	sp|P01031|CO5_HUMAN	beta chain	y8, y9	Classical/Lectin/Alternative/Extrinsic	9	197 organs, highest in liver	n/a	476
20	ITHYNYLILSK	C5	sp|P01031|CO5_HUMAN	beta chain	y3, y5	Classical/Lectin/Alternative/Extrinsic	9	197 organs, highest in liver	279.054	475
21	ISLGPR	C5	sp|P01031|CO5_HUMAN	C5a	y4, y5	Classical/Lectin/Alternative/Extrinsic	9	197 organs, highest in liver	526.85	476
22	ALNHLPLEYNSALYSR	C6	sp|P13671|CO6_HUMAN	N/A	y3, y6	Classical/Lectin/Alternative/Extrinsic	5	117 organs, highest in liver	n/a	476
23	DLHLSDVFLK	C6	sp|P13671|CO6_HUMAN	N/A	y7, y8	Classical/Lectin/Alternative/Extrinsic	5	117 organs, highest in liver	15179.1	476
24	LSGNVLSYTFQVK	C7	sp|P10643|CO7_HUMAN	N/A	y7, y8	Classical/Lectin/Alternative/Extrinsic	5	195 organs, highest in adrenal cortex (kidney)	n/a	476
25	LTPLYELVK	C7	sp|P10643|CO7_HUMAN	N/A	y7, y72+	Classical/Lectin/Alternative/Extrinsic	5	195 organs, highest in adrenal cortex (kidney)	1067.98	476
26	AIDEDCSQYEPIPGSQK	C8A	sp|P07357|CO8A_HUMAN	C8 alpha chain	y5, y7	Classical/Lectin/Alternative/Extrinsic	1	33 organs, highest in right lobe liver	n/a	476
27	MESLGITSR	C8A	sp|P07357|CO8A_HUMAN	C8 alpha chain	y5, y7	Classical/Lectin/Alternative/Extrinsic	1	33 organs, highest in right lobe liver	1023.21	476
28	IPGIFELGISSQSDR	C8B	sp|P07358|CO8B_HUMAN	C8 beta chain	y8, y11	Classical/Lectin/Alternative/Extrinsic	1	54 organs, highest in right lobe liver	n/a	475
29	SGFSFGFK	C8B	sp|P07358|CO8B_HUMAN	C8 beta chain	y5, y6	Classical/Lectin/Alternative/Extrinsic	1	54 organs, highest in right lobe liver	460.812	476
30	QLYGDTGVLGR	C8G	sp|P07360|CO8G_HUMAN	C8 gamma chain	y8, y9	Classical/Lectin/Alternative/Extrinsic	9	91 organs, highest in right lobe liver	n/a	476
31	SLPVSDSVLSGFEQR	C8G	sp|P07360|CO8G_HUMAN	C8 gamma chain	y6, y7	Classical/Lectin/Alternative/Extrinsic	9	91 organs, highest in right lobe liver	n/a	475
32	VQEAHLTEDQIFYFPK	C8G	sp|P07360|CO8G_HUMAN	C8 gamma chain	y3, y5	Classical/Lectin/Alternative/Extrinsic	9	91 organs, highest in right lobe liver	2252.18	476
33	TSNFNAAISLK	C9	sp|P02748|CO9_HUMAN	C9a	y3, y8	Classical/Lectin/Alternative/Extrinsic	5	60 organs, highest in liver	n/a	476
34	VVEESELAR	C9	sp|P02748|CO9_HUMAN	C9a	b2, y7	Classical/Lectin/Alternative/Extrinsic	5	60 organs, highest in liver	804.708	476
35	LSPIYNLVPVK	C9	sp|P02748|CO9_HUMAN	C9b	y3, y9	Classical/Lectin/Alternative/Extrinsic	5	60 organs, highest in liver	280.371	476
36	STGSWSTLK	FB	sp|P00751-1/2|CFAB_HUMAN	Fba	y4, y7	Alternative	6	199 organs, highest in right lobe liver	312.004	476
37	YGLVTYATYPK	FB	sp|P00751-1/2|CFAB_HUMAN	FBb	b3, y7	Alternative	6	199 organs, highest in right lobe liver	39.3573	476
38	DAQYAPGYDK	FB	sp|P00751-1|CFAB_HUMAN	FBb (isoform1)	y5,y7	Alternative	6	199 organs, highest in right lobe liver	n/a	476
39	GDSGGPLVCGGVLEGVVTSGSR	FD	sp|P00746|CFAD_HUMAN	N/A	y5, y14	Alternative	19	194 organs, highest in adipose tissue of abdominal region (fat cells)	1595.6	476
40	NDFTWFK	FH	sp|P08603-1|CFAH_HUMAN	N/A	y4, y5	Alternative	1	206 organs, highest in liver	469.84	476
41	SIDVACHPGYALPK	FH	sp|P08603-1/2|CFAH_HUMAN	N/A	b12, y7	Alternative	1	206 organs, highest in liver	598.307	476
42	SSNLIILEEHLK	FH	sp|P08603-1|CFAH_HUMAN	N/A	y7, y8	Alternative	1	206 organs, highest in liver	184.451	476
43	HGNTDSEGIVEVK	FI	sp|P05156|CFAI_HUMAN	heavy chain	y4, y6	Classical/Lectin/Alternative/Extrinsic	4	177 organs, highest in visceral pleura	802.359	476
44	ESDTSYVSLK	CRP	sp|P02741-1/2|CRP_HUMAN	N/A	y3, y6	Classical	1	86 organs, highest in right lobe liver	711.319	476
45	LVVEEK	Properdin	sp|P27918|PROP_HUMAN	N/A	y4, y5	Alternative	X	115 organs, highest in leukocytes	2480.95	472
46	DQVLVSCDTGYK	MASP1/3	sp|P02745-1/2/3/4|MASP1/3_HUMAN	heavy chain	y7, y8	Lectin	3	161 organs, highest in ectocervix	n/a	472
47	SLPTCLPVCGLPK	MASP1	sp|P48740-1|MASP1_HUMAN	heavy chain	y7, y11	Lectin	3	161 organs, highest in ectocervix	1369.1	475
48	DSDLLSPSDFK	MASP1	sp|P48740-1|MASP1_HUMAN	light chain	y6, y7	Lectin	3	161 organs, highest in ectocervix	n/a	476
49	TLSDVLQYVK	MASP3	sp|P48740-2|MASP3_HUMAN	light chain	b2, y8	Lectin	3	161 organs, highest in ectocervix	2018.12	476
50	FQASVATPR	MBL2	sp|P11226|MBL2_HUMAN	N/A	y6, y7	Lectin	10	24 organs, highest in liver	1681.31	476
51	TEGQFVDLTGNR	MBL2	sp|P11226|MBL2_HUMAN	N/A	y7, y8	Lectin	10	24 organs, highest in liver	n/a	476
52	LLGEVDHYQLALGK	FCN3	sp|O75636-1/2|FCN3_HUMAN	N/A	y12, y13	Lectin	1	106 organs, highest in right lung	928.956	475
53	TFAHYATFR	FCN3	sp|O75636-1/2|FCN3_HUMAN	N/A	y5, y7	Lectin	1	106 organs, highest in right lung	n/a	475
54	VFIGINDLEK	Collectin 11	sp|Q9BWP8-1until9|COL11_HUMAN	N/A	y7, y8	Lectin	2	124 organs, highest in liver	4388.59	475
55	LSLEIEQLELQR	C4BPA	sp|P04003|C4BPA_HUMAN	alpha chain	y4, y7	Classical/Lectin	1	100 organs, highest in liver	n/a	475
56	YTCLPGYVR	C4BPA	sp|P04003|C4BPA_HUMAN	alpha chain	y5, y7	Classical/Lectin	1	100 organs, highest in liver	648.922	476
57	ALLAFQESK	C4BPB	sp|P20851-1/2|C4BPB_HUMAN	beta chain	y6, y7	Classical/Lectin	1	97 organs, highest in right lobe liver	976.547	476
58	LVLLNAIYLSAK	IC1	sp|P05155|IC1_HUMAN	N/A	y9, y10	Classical/Lectin/Extrinsic	11	232 organs, highest in right lobe liver	n/a	476
59	TNLESILSYPK	IC1	sp|P05155|IC1_HUMAN	N/A	y7, y8	Classical/Lectin/Extrinsic	11	232 organs, highest in right lobe liver	1636.99	476
60	ASSIIDELFQDR	Clusterin	sp|P10909-1/2/3/4/5|CLUS_HUMAN	beta chain	y4, y7	Classical/Lectin/Alternative/Extrinsic	8	238 organs, highest in tendon of biceps brachii, eye	3886.88	476
61	IDSLLENDR	Clusterin	sp|P10909-1/2/4/5|CLUS_HUMAN	beta chain	y5, y7	Classical/Lectin/Alternative/Extrinsic	8	238 organs, highest in tendon of biceps brachii, eye	n/a	476
62	DVWGIEGPIDAAFTR	Vitronectin	sp|P04004|VTNC_HUMAN	V65 subunit	y9, y10	Classical/Lectin/Alternative/Extrinsic	17	87 organs, highest in right lobe liver	3616.74	476
63	FEDGVLDPDYPR	Vitronectin	sp|P04004|VTNC_HUMAN	V65 subunit	y5, y7	Classical/Lectin/Alternative/Extrinsic	17	87 organs, highest in right lobe liver	490.818	476
64	TGDIVEFVCK	FHR-2	sp|P36980-1/2|FHR2_HUMAN	N/A	y5, y6	Still unclear	1	51 organs, highest in right lobe liver	1939.26	476
N = Number
^ = [database] Uniprot. Consulted: 2020 06 20. URL: https://www.uniprot.org/. UNIPROT CONSORTIUM. UniProt: a worldwide hub of p rotein knowledge. Nucleic acids research, 2019, 47.D1: D506 D515.
# = [database] Bgee. Consulted: 2020 06 20. URL: https://www.bgee.org/. BASTIAN, Frederic, et al. Bgee: integrating and compari ng heterogeneous transcriptome data among species. In: International Workshop on Data Integration in the Life Sciences. Sprin ger , Berlin, Heidelberg, 2008. p. 124 131.

## Sheet: Supplementary Table S2
Supplementary Table S2. Demographic factors, clinical characteristics and other measurements of the study cohort
	AMD	Controls	P-value
N	255	221	NA
Age (years), mean (SD)	74.2 (8.1)	73.8 (5.6)	0.36858
Female sex, n (%)	151 (59.2)	129 (58.4)	0.852
Type of AMD
early AMD, n (%)	14 (5.5)	NA	NA
intermediate AMD, n (%)	117 (45.9)	NA	NA
Advanced AMD: geographic atrophy, n (%)	7 (2.7)	NA	NA
Advanced AMD: neovascular AMD, n (%)	115 (45.1)	NA	NA
Advanced AMD: mixed type, n (%)	2 (0.78)	NA	NA
BMI (kg/m2), median (interquartile range)	25 (5)	25 (4)	0.424583
Triglyceride levels (mmol/l), median (interquartile range)	1.5 (1.0)	1.8 (1.1)	0.0287787
Smoking
Never, n (%)	76 (34.9)	81 (31.8)	Reference
Past, n (%)	127 (57.5)	136 (53.3)	0.606118
Current, n (%)	11 (5)	27 (10.6)	0.0193438
N= number; AMD=age-related macular degeneration; NA= not applicable; BMI=Body mass index

## Sheet: Supplementary Table S3
Supplementary Table S3. Pearson correlation anlayses of peptides in the complement pathway with age
Peptide ID	Protein	Pearson's r	P-value	pFDR
39	FD	0.251992	2.49595e-08	1.59741e-06
46	MASP1/3	-0.191619	2.77861e-05	0.000889155
52	FCN3	-0.177625	9.94046e-05	0.00212063
35	C9	0.143872	0.00164922	0.0263875
32	C8G	-0.136727	0.00279667	0.0293777
31	C8G	-0.136585	0.00285478	0.0293777
48	MASP1	-0.134793	0.00321319	0.0293777
25	C7	0.132153	0.00387291	0.0309832
27	C8A	-0.128632	0.00494309	0.0316358
26	C8A	-0.129559	0.00463803	0.0316358
55	C4BPA	-0.122291	0.00762449	0.0406639
60	Clusterin	-0.123304	0.00707322	0.0406639
53	FCN3	-0.117047	0.0106789	0.0525731
34	C9	0.114429	0.012483	0.0570653
63	Vitronectin	-0.104615	0.0224485	0.0845121
62	Vitronectin	-0.104723	0.0223091	0.0845121
14	C4	-0.105594	0.0212128	0.0845121
61	Clusterin	-0.097452	0.0335347	0.119235
58	IC1	-0.094394	0.0395309	0.130972
30	C8G	-0.0937382	0.0409287	0.130972
21	C5	0.0880228	0.0549706	0.159005
57	C4BPB	-0.0872512	0.0571424	0.159005
49	MASP3	-0.0889883	0.0523503	0.159005
38	FB	-0.0840455	0.0669397	0.178506
13	C3	-0.0803051	0.0800715	0.183021
3	C1QB	-0.0808217	0.0781422	0.183021
33	C9	0.0804837	0.0794	0.183021
16	C4	-0.0808748	0.0779464	0.183021
43	FI	-0.0776785	0.0904846	0.193034
29	C8B	-0.078272	0.0880413	0.193034
56	C4BPA	-0.0768297	0.0940729	0.194215
59	IC1	-0.073592	0.108815	0.209817
11	C2	-0.0730474	0.111465	0.209817
15	C4	-0.0743624	0.105152	0.209817
36	FB	-0.0638887	0.16403	0.283728
23	C6	-0.064376	0.160832	0.283728
64	FHR-2	0.0646109	0.159307	0.283728
17	C4	-0.0629204	0.170528	0.287205
6	C1R	-0.0576614	0.209203	0.343308
2	C1QB	-0.055554	0.226358	0.353339
8	C1S	-0.0561769	0.221186	0.353339
7	C1R	0.0530575	0.247948	0.377825
22	C6	-0.0459569	0.317043	0.461153
54	Collectin 11	-0.0463344	0.313591	0.461153
40	FH	-0.0434588	0.344091	0.489374
1	C1QA	-0.0404143	0.37898	0.527276
47	MASP1	-0.0394899	0.390489	0.53173
37	FB	-0.0354969	0.439725	0.551812
44	CRP	0.0362907	0.429558	0.551812
41	FH	-0.0371628	0.418547	0.551812
24	C7	0.0360655	0.432429	0.551812
42	FH	-0.0335809	0.464823	0.57209
28	C8B	0.0299274	0.515253	0.622192
12	C3	-0.0281722	0.539777	0.639735
19	C5	-0.0173199	0.706241	0.807132
4	C1QC	0.0176141	0.701488	0.807132
9	C1S	-0.00977964	0.831475	0.933586
20	C5	0.00837066	0.855617	0.944129
18	C5	-0.00158398	0.972504	0.980339
5	C1QC	0.00404803	0.929808	0.980339
10	C2	-0.00358352	0.93824	0.980339
51	MBL2	-0.00113254	0.980339	0.980339
50	MBL2	0.00263643	0.954251	0.980339
45	Properdin	0.00553825	0.90448	0.980339

## Sheet: Supplementary Table S4
Supplementary Table S4. Pearson correlation anlayses of peptides in the complement pathway with sex
Peptide ID	Protein	Pearson's r	P-value	pFDR
23	C6	0.189471	3.17362e-05	0.00203112
50	MBL2	-0.177819	9.60044e-05	0.00307214
51	MBL2	-0.16935	0.000205707	0.00329132
57	C4BPB	0.171558	0.00016921	0.00329132
58	IC1	0.15597	0.000638216	0.00816916
59	IC1	0.153214	0.000797198	0.00850344
43	FI	0.137672	0.00261166	0.0185718
61	Clusterin	0.138465	0.00246501	0.0185718
60	Clusterin	0.137837	0.00258052	0.0185718
39	FD	-0.135971	0.00295341	0.0189018
27	C8A	0.126149	0.00585098	0.034042
34	C9	-0.11777	0.010122	0.0539842
35	C9	-0.11182	0.0146519	0.0598163
56	C4BPA	0.113692	0.0130645	0.0598163
29	C8B	0.111484	0.0149541	0.0598163
54	Collectin 11	0.112838	0.0138693	0.0598163
22	C6	0.108098	0.0183175	0.06896
31	C8G	0.101923	0.0263308	0.0936206
26	C8A	0.0930764	0.0423812	0.13562
14	C4	0.0936638	0.0410899	0.13562
13	C3	0.0879721	0.0551113	0.167958
5	C1QC	-0.085673	0.0618059	0.177204
32	C8G	0.0850656	0.0636827	0.177204
55	C4BPA	0.0809264	0.0780703	0.208188
12	C3	0.0738724	0.107471	0.249332
19	C5	0.0744166	0.104898	0.249332
4	C1QC	-0.0727409	0.112978	0.249332
10	C2	0.0739715	0.109246	0.249332
11	C2	0.0759394	0.0979579	0.249332
7	C1R	-0.0644632	0.160264	0.330868
16	C4	0.0646077	0.159327	0.330868
45	Properdin	0.0619018	0.17941	0.35882
49	MASP3	0.0578964	0.207349	0.402132
33	C9	-0.0556899	0.225222	0.411835
8	C1S	0.0563085	0.220104	0.411835
15	C4	0.0531643	0.246996	0.427236
25	C7	-0.0538711	0.24076	0.427236
53	FCN3	-0.0480685	0.295804	0.498197
63	Vitronectin	0.0437488	0.340878	0.559389
42	FH	0.0415888	0.365272	0.584435
17	C4	0.0387901	0.39845	0.621971
62	Vitronectin	0.0371492	0.418717	0.638045
41	FH	0.0356241	0.438086	0.652036
38	FB	0.0329196	0.473667	0.68897
47	MASP1	-0.0298257	0.516683	0.734838
37	FB	0.0278621	0.544251	0.741107
44	CRP	-0.0283831	0.536745	0.741107
1	C1QA	-0.0265229	0.563776	0.751702
48	MASP1	0.0228777	0.618564	0.807921
9	C1S	-0.0216563	0.637429	0.815909
30	C8G	0.0173967	0.704998	0.851319
40	FH	0.0183646	0.689416	0.851319
46	MASP1/3	0.0180128	0.696291	0.851319
36	FB	0.0138994	0.762297	0.901023
24	C7	-0.0131765	0.774317	0.901023
52	FCN3	0.00952283	0.836007	0.914621
18	C5	-0.0106374	0.816943	0.914621
3	C1QB	-0.0097246	0.832409	0.914621
28	C8B	-0.00910154	0.843166	0.914621
6	C1R	-0.00732172	0.873414	0.916369
20	C5	0.00811626	0.859959	0.916369
21	C5	-0.000117188	0.997965	0.997965
2	C1QB	0.000579511	0.989939	0.997965
64	FHR-2	-0.0014699	0.974484	0.997965
Negative Pearson correlation indicates lower values in males.

## Sheet: Supplementary Table S5
Supplementary Table S5. Pearson correlation anlayses of peptides in the complement pathway with smoking status.
Peptide ID	Protein	Pearson's r	P-value	pFDR
52	FCN3	0.0731374	0.118451	0.769498
6	C1R	0.0739256	0.114126	0.769498
34	C9	0.0914338	0.0505218	0.769498
33	C9	0.0827815	0.0767608	0.769498
35	C9	0.0822583	0.0786498	0.769498
56	C4BPA	-0.0704412	0.132257	0.769498
59	IC1	0.0854247	0.0677731	0.769498
9	C1S	0.0753787	0.107167	0.769498
51	MBL2	0.0963932	0.039201	0.769498
50	MBL2	0.103579	0.0266507	0.769498
48	MASP1	0.0712239	0.128003	0.769498
53	FCN3	0.050553	0.280842	0.966598
7	C1R	0.0104626	0.823299	0.966598
39	FD	0.0318459	0.496604	0.966598
37	FB	0.0216486	0.644019	0.966598
36	FB	0.030025	0.521553	0.966598
38	FB	0.0250961	0.592168	0.966598
12	C3	-0.0417126	0.373124	0.966598
20	C5	-0.0312277	0.505471	0.966598
21	C5	-0.0109722	0.814844	0.966598
18	C5	0.0140721	0.763911	0.966598
19	C5	0.0243091	0.603836	0.966598
44	CRP	0.0399917	0.393181	0.966598
5	C1QC	0.0410174	0.381149	0.966598
4	C1QC	0.0109137	0.815815	0.966598
55	C4BPA	-0.0396678	0.397546	0.966598
63	Vitronectin	0.0296407	0.526901	0.966598
62	Vitronectin	0.0377248	0.420573	0.966598
58	IC1	0.0360344	0.441707	0.966598
10	C2	-0.0166623	0.723873	0.966598
11	C2	0.0545264	0.244183	0.966598
26	C8A	0.0334651	0.474963	0.966598
29	C8B	0.0107403	0.81869	0.966598
28	C8B	0.0441945	0.345863	0.966598
32	C8G	0.0202034	0.666298	0.966598
31	C8G	0.0106095	0.821053	0.966598
30	C8G	0.0441642	0.345664	0.966598
41	FH	-0.0237741	0.611825	0.966598
40	FH	0.0168039	0.719848	0.966598
8	C1S	0.020184	0.6666	0.966598
16	C4	0.0257127	0.583099	0.966598
15	C4	0.0266647	0.569227	0.966598
17	C4	0.0259736	0.579282	0.966598
14	C4	0.0233114	0.618773	0.966598
25	C7	-0.0115971	0.804506	0.966598
61	Clusterin	0.0311726	0.505756	0.966598
60	Clusterin	0.0383794	0.412551	0.966598
23	C6	-0.02134	0.64875	0.966598
57	C4BPB	-0.0556226	0.234817	0.966598
45	Properdin	-0.052844	0.261164	0.966598
64	FHR-2	0.0434374	0.353668	0.966598
47	MASP1	-0.0286041	0.541904	0.966598
49	MASP3	0.0513292	0.272985	0.966598
46	MASP1/3	-0.0100636	0.83067	0.966598
54	Collectin 11	-0.0131306	0.779521	0.966598
13	C3	0.00348608	0.940691	0.966619
1	C1QA	-0.00350878	0.940305	0.966619
3	C1QB	-0.0040872	0.930488	0.966619
2	C1QB	-0.00722075	0.877523	0.966619
27	C8A	0.00576283	0.902112	0.966619
42	FH	0.00882189	0.850654	0.966619
24	C7	-0.00410933	0.930112	0.966619
22	C6	-0.00284893	0.951516	0.966619
43	FI	0.00105968	0.981957	0.981957

## Sheet: Supplementary Table S6
Supplementary Table S6. Pearson correlation anlayses of peptides in the complement pathway with BMI.
Peptide ID	Protein	Pearson's r	P-value	pFDR
44	CRP	0.276407	9.48682e-09	6.07156e-07
12	C3	0.235123	1.20281e-06	3.84898e-05
41	FH	0.213896	1.05364e-05	0.000224777
43	FI	0.196078	5.54917e-05	0.000887867
42	FH	0.186552	0.000127238	0.00162864
40	FH	0.182597	0.000177456	0.00189287
63	Vitronectin	0.172468	0.000403367	0.00368792
13	C3	0.136029	0.00539605	0.0431684
38	FB	0.133006	0.00652807	0.0464218
45	Properdin	0.125177	0.0107939	0.0690811
39	FD	0.11831	0.0156399	0.075736
36	FB	0.117288	0.0165672	0.075736
11	C2	0.119255	0.0148241	0.075736
17	C4	0.119634	0.0145073	0.075736
37	FB	0.113516	0.0204167	0.0871114
10	C2	0.106056	0.0315863	0.126345
18	C5	0.100804	0.0396341	0.140921
1	C1QA	0.10148	0.0383213	0.140921
64	FHR-2	0.0965241	0.0488656	0.1646
51	MBL2	-0.0945014	0.0538181	0.172218
62	Vitronectin	0.0903368	0.0653344	0.199114
49	MASP3	0.084172	0.0860287	0.250265
52	FCN3	0.0811972	0.0981573	0.262408
21	C5	0.0792021	0.106303	0.262408
15	C4	0.0784921	0.109485	0.262408
57	C4BPB	0.0778757	0.112308	0.262408
46	MASP1/3	0.0777156	0.114803	0.262408
54	Collectin 11	0.0775357	0.114326	0.262408
50	MBL2	-0.0711037	0.14721	0.324878
7	C1R	0.0684226	0.163115	0.338108
16	C4	0.0683164	0.163771	0.338108
4	C1QC	0.0644342	0.189116	0.378232
22	C6	0.0633122	0.196951	0.381966
8	C1S	0.0612773	0.211762	0.39861
47	MASP1	0.0585839	0.233139	0.426312
29	C8B	0.0569134	0.246189	0.43767
35	C9	0.0555945	0.257323	0.4451
14	C4	0.0544631	0.267148	0.449934
56	C4BPA	0.0530423	0.279847	0.459236
33	C9	0.0477367	0.330832	0.504126
55	C4BPA	-0.0487985	0.320761	0.504126
48	MASP1	-0.0483113	0.325038	0.504126
58	IC1	-0.0440391	0.369698	0.514362
32	C8G	0.044421	0.365558	0.514362
31	C8G	0.0453876	0.355208	0.514362
9	C1S	0.0450366	0.358944	0.514362
20	C5	0.0431407	0.379552	0.516837
19	C5	0.0382978	0.43539	0.58052
24	C7	-0.0355414	0.469173	0.612797
30	C8G	0.0331342	0.499819	0.627224
25	C7	-0.0337788	0.49151	0.627224
23	C6	0.030902	0.529157	0.65127
6	C1R	0.027673	0.573087	0.679215
5	C1QC	0.0281169	0.566947	0.679215
26	C8A	0.0231668	0.637125	0.741381
28	C8B	0.0197824	0.687457	0.785665
53	FCN3	0.0175755	0.720777	0.809294
2	C1QB	0.0162335	0.741004	0.81766
59	IC1	0.0150065	0.759956	0.824359
3	C1QB	0.0138201	0.778419	0.830314
34	C9	0.0121759	0.80421	0.843761
27	C8A	0.00389815	0.936743	0.940569
61	Clusterin	0.00366197	0.940569	0.940569
60	Clusterin	-0.00395737	0.935784	0.940569

## Sheet: Supplementary Table S7
Supplementary Table S7. Association of peptides in the complement pathway with age-related macular degeneration
Peptide id	Protein	B	SE	P-value	P-valueFDR
64	FHR-2	0.23449	0.0941388	0.0127421	0.517456
44	CRP	0.225784	0.0938792	0.0161705	0.517456
54	Collectin 11	0.187187	0.0939969	0.0464354	0.913227
8	C1S	0.177824	0.0934576	0.0570767	0.913227
61	Clusterin	0.138224	0.093961	0.14127	0.997944
4	C1QC	-0.128831	0.0928765	0.165404	0.997944
9	C1S	-0.128352	0.0926705	0.166043	0.997944
38	FB	-0.122793	0.0929493	0.186476	0.997944
5	C1QC	-0.118259	0.0928677	0.20287	0.997944
59	IC1	0.105043	0.0937512	0.262525	0.997944
37	FB	-0.102482	0.0925346	0.268077	0.997944
28	C8B	0.0983739	0.0925673	0.287905	0.997944
12	C3	-0.0930221	0.0926244	0.315237	0.997944
1	C1QA	0.092503	0.0925142	0.317369	0.997944
60	Clusterin	0.0910061	0.0938164	0.332024	0.997944
11	C2	0.0838591	0.0927779	0.366065	0.997944
58	IC1	0.080388	0.0937174	0.391019	0.997944
49	MASP3	0.0764883	0.0927641	0.409629	0.997944
33	C9	0.0748777	0.0926848	0.419162	0.997944
7	C1R	-0.0683055	0.09253	0.460394	0.997944
39	FD	0.0695545	0.0958956	0.468259	0.997944
3	C1QB	-0.0640201	0.0925298	0.489009	0.997944
30	C8G	-0.0610727	0.0926131	0.509614	0.997944
40	FH	-0.0594395	0.0922773	0.519485	0.997944
10	C2	-0.0588123	0.09309	0.527531	0.997944
56	C4BPA	-0.0538848	0.0929519	0.562113	0.997944
63	Vitronectin	0.0514358	0.0927322	0.57912	0.997944
14	C4	0.0508193	0.0929878	0.584712	0.997944
48	MASP1	0.0487503	0.0930203	0.600221	0.997944
15	C4	0.0470932	0.0925131	0.610721	0.997944
42	FH	-0.0428939	0.0922556	0.64197	0.997944
19	C5	0.0420113	0.0923924	0.649321	0.997944
16	C4	0.0420521	0.0925839	0.649681	0.997944
22	C6	0.0412616	0.0927424	0.656388	0.997944
53	FCN3	-0.0408129	0.0930433	0.66092	0.997944
51	MBL2	0.0405555	0.0934937	0.664449	0.997944
34	C9	0.0402945	0.0932909	0.665797	0.997944
57	C4BPB	0.0339655	0.0937336	0.717082	0.997944
13	C3	-0.0330982	0.0926816	0.721004	0.997944
41	FH	-0.0307621	0.092205	0.73866	0.997944
29	C8B	-0.0305624	0.0929013	0.742173	0.997944
36	FB	-0.0287571	0.0922941	0.755358	0.997944
25	C7	0.0275816	0.0930077	0.766808	0.997944
32	C8G	-0.0257801	0.0932142	0.782112	0.997944
20	C5	-0.023433	0.0921966	0.799369	0.997944
47	MASP1	0.0231848	0.0923324	0.801735	0.997944
24	C7	0.0185688	0.0921607	0.840321	0.997944
6	C1R	0.0184688	0.0922728	0.84136	0.997944
43	FI	-0.0162783	0.093152	0.861277	0.997944
46	MASP1/3	0.0153448	0.0942235	0.870633	0.997944
45	Properdin	0.0142474	0.0926037	0.877725	0.997944
55	C4BPA	-0.0139906	0.0931027	0.880551	0.997944
17	C4	0.0130308	0.0923247	0.887758	0.997944
62	Vitronectin	-0.0129839	0.0926239	0.888519	0.997944
23	C6	0.012988	0.093873	0.889958	0.997944
52	FCN3	-0.011226	0.0936885	0.904624	0.997944
26	C8A	0.00794071	0.0931577	0.932071	0.997944
18	C5	-0.00780269	0.0920728	0.932464	0.997944
31	C8G	-0.00577737	0.0933927	0.950673	0.997944
35	C9	0.00299027	0.0935088	0.974489	0.997944
50	MBL2	-0.00277874	0.0935693	0.976309	0.997944
27	C8A	-0.00156951	0.0934537	0.986601	0.997944
21	C5	-0.000823252	0.0924424	0.992894	0.997944
2	C1QB	0.000237663	0.0922387	0.997944	0.997944

## Sheet: Supplementary Table S8
Supplementary Table S8. List of the genetic variants included in this study. Each variant is mentioned throughout
the results section, however, we provide a complete overview in this table. Remark column shows the
reason for the inclusion of the genetic variant as was reported in the literature.
Gene / Locus	Variant	Remark
ABCA1	rs2740488	Independently associated AMD variant
ACAD10	rs61941274	Independently associated AMD variant
ADAMTS9-AS2	rs62247658	Independently associated AMD variant
APOE	rs429358	Independently associated AMD variant
APOE(EXOC3L2/MARK4)	rs73036519	Independently associated AMD variant
ARHGAP21	rs12357257	Independently associated AMD variant
ARMS2/HTRA1	rs3750846	Independently associated AMD variant
B3GALTL	rs9564692	Independently associated AMD variant
C2/CFB/SKIV2L	rs641153	Associated with reduced FB levels
C2/CFB/SKIV2L	rs4151667	Associated with reduced FB levels
C2/CFB/SKIV2L	rs144629244	Independently associated AMD variant
C2/CFB/SKIV2L	rs116503776	Independently associated AMD variant
C2/CFB/SKIV2L	rs181705462	Independently associated AMD variant
C2/CFB/SKIV2L (PBX2)	rs114254831	Independently associated AMD variant
C20orf85	rs201459901	Independently associated AMD variant
C3	p.Lys155Gln	Enriched rare variant in AMD
C3	rs2230199	Independently associated AMD variant
C3	rs147859257	Independently associated AMD variant
C3 (NRTN/FUT6)	rs12019136	Independently associated AMD variant
C9	p.Arg118Trp	Associated with altered C9 levels
C9	p.Pro167Ser	Associated with altered C9 levels
C9	rs62358361	Independently associated AMD variant
CETP	rs5817082	Independently associated AMD variant
CETP	rs17231506	Independently associated AMD variant
CFH	rs61818925	Independently associated AMD variant
CFH	rs570618	Independently associated AMD variant
CFH	rs10922109	Independently associated AMD variant
CFH	rs148553336	Independently associated AMD variant
CFH	rs187328863	Independently associated AMD variant
CFH	rs35292876	Independently associated AMD variant
CFH	rs191281603	Independently associated AMD variant
CFH	p.Arg175Gln	Enriched rare variant in AMD
CFH	p.Ser193Leu	Enriched rare variant in AMD
CFH	p.Arg1210Cys	Enriched rare variant in AMD
CFH (CFHR3/CFHR1)	rs61818925	Independently associated AMD variant
CFI	p.Leu131Arg	Enriched rare variant in AMD
CFI	p.Ala258Thr	Enriched rare variant in AMD
CFI	p.Arg406His	Enriched rare variant in AMD
CFI	p.Arg448Cys	Enriched rare variant in AMD
CFI	p.Pro553Ser	Enriched rare variant in AMD
CFI	rs10033900	Independently associated AMD variant
CNN2	rs67538026	Independently associated AMD variant
COL4A3	rs11884770	Independently associated AMD variant
COL8A1	rs140647181	Independently associated AMD variant
COL8A1	rs55975637	Independently associated AMD variant
CTRB2/CTRB1	rs72802342	Independently associated AMD variant
KMT2E/SRPK2	rs1142	Independently associated AMD variant
LIPC	rs2043085	Independently associated AMD variant
LIPC	rs2070895	Independently associated AMD variant
MIR6130/RORB	rs10781182	Independently associated AMD variant
MMP9	rs142450006	Independently associated AMD variant
NPLOC4/TSPAN10	rs6565597	Independently associated AMD variant
PILRB/PILRA	rs7803454	Independently associated AMD variant
PRLR/SPEF2	rs114092250	Independently associated AMD variant
RAD51B	rs2842339	Independently associated AMD variant
RAD51B	rs61985136	Independently associated AMD variant
RDH5/CD63	rs3138141	Independently associated AMD variant
SLC16A8	rs8135665	Independently associated AMD variant
SYN3/TIMP3	rs5754227	Independently associated AMD variant
TGFBR1	rs1626340	Independently associated AMD variant
TMEM97/VTN	rs11080055	Independently associated AMD variant
TNFRSF10A	rs79037040	Independently associated AMD variant
TRPM3	rs71507014	Independently associated AMD variant
VEGFA	rs943080	Independently associated AMD variant

## Sheet: Supplementary Table S9
Supplementary Table S9. Association of FHR-2 peptides with CFH variants known to be associated with age-related macular degeneration
Peptide id	Protein	AMD variant*	Risk Allele	AF	Locus gene(s)^	B	SE	P-value	P-valueFDR
64	FHR-2	rs61818925	G	0.638728	CFH (CFHR3/CFHR1)	0.569864	0.0749547	2.83764e-13	1.134e-12
64	FHR-2	rs570618	T	0.442197	CFH	0.559628	0.0738036	3.24055e-13	1.134e-12
64	FHR-2	rs10922109	C	0.617052	CFH	0.539851	0.0779782	2.20271e-11	5.13333e-11
64	FHR-2	rs148553336	T	0.996	CFH	1.32049	0.584602	0.0245279	0.04375
64	FHR-2	rs187328863	T	0.0375723	CFH	0.245113	0.207026	0.23725	0.266
64	FHR-2	rs35292876	T	0.0144509	CFH	0.372689	0.324822	0.252035	0.266
64	FHR-2	rs191281603	G	0.00289017	CFH	0.800104	0.718176	0.26603	0.266
AF= Allele frequency
*AMD associated variants from the IAMDGC GWAS on AMD (Fritsche et al., 2016)
^Nearest genes to the variant

## Sheet: Supplementary Table S10
Supplementary Table S10. Association of FH peptides with CFH variants known to be associated with age-related macular degeneration
Peptide id	Protein	AMD variant*	Risk Allele	AF	Locus gene(s)^	B	SE	P-value	P-valueFDR
41	FH	rs148553336	T	0.996	CFH	1.66945	0.572607	0.00378592	0.084
40	FH	rs148553336	T	0.996	CFH	1.39903	0.575867	0.0156385	0.112
42	FH	rs148553336	T	0.996	CFH	1.40305	0.580951	0.0162568	0.112
41	FH	rs61818925	G	0.638728	CFH (CFHR3/CFHR1)	0.179329	0.0791913	0.0241704	0.126
42	FH	rs10922109	C	0.617052	CFH	-0.164048	0.0823677	0.0472064	0.1974
40	FH	rs61818925	G	0.638728	CFH (CFHR3/CFHR1)	0.140213	0.0795786	0.0789742	0.2765
42	FH	rs61818925	G	0.638728	CFH (CFHR3/CFHR1)	0.120099	0.0803749	0.136039	0.408
41	FH	rs570618	T	0.442197	CFH	0.111331	0.0782973	0.155969	0.4095
40	FH	rs10922109	C	0.617052	CFH	-0.104438	0.0819337	0.203296	0.473667
40	FH	rs191281603	G	0.00289017	CFH	0.590397	0.70883	0.405474	0.83125
41	FH	rs191281603	G	0.00289017	CFH	-0.512732	0.707626	0.469206	0.83125
41	FH	rs187328863	T	0.0375723	CFH	-0.145759	0.204037	0.475485	0.83125
42	FH	rs187328863	T	0.0375723	CFH	-0.107713	0.206291	0.601909	0.895125
42	FH	rs35292876	T	0.0144509	CFH	-0.148095	0.323658	0.647555	0.895125
40	FH	rs570618	T	0.442197	CFH	0.0349237	0.0786594	0.657334	0.895125
40	FH	rs187328863	T	0.0375723	CFH	-0.0837626	0.204538	0.682414	0.895125
40	FH	rs35292876	T	0.0144509	CFH	-0.100197	0.32091	0.755058	0.9093
42	FH	rs570618	T	0.442197	CFH	-0.0217479	0.07936	0.784219	0.9093
42	FH	rs191281603	G	0.00289017	CFH	0.140409	0.715702	0.844584	0.9093
41	FH	rs10922109	C	0.617052	CFH	-0.0138567	0.0819655	0.865853	0.9093
41	FH	rs35292876	T	0.0144509	CFH	0.0340945	0.320327	0.915299	0.915
AF= Allele frequency
*AMD associated variants from the IAMDGC GWAS on AMD (Fritsche et al., 2015)
^Nearest genes to the variant

[truncated: 11 more sheets: Suplementary Table S11, Supplementary Table S12, Supplementary Table S13, Supplementary Table S14, Supplementary Table S15, Supplementary Table S16, Supplementary Table S17, Supplementary Table S18, Supplementary Table S19, Supplementary Table S20, Supplementary Table S21]
