# Supplementary figures and images for: Semi-Quantitative Multiplex Profiling of the Complement System Identifies Associations of Complement Proteins with Genetic Variants and Metabolites in Age-Related Macular Degeneration
Source: MDPI journal article supplement (doi:10.3390/jpm11121256), 2021-11-25

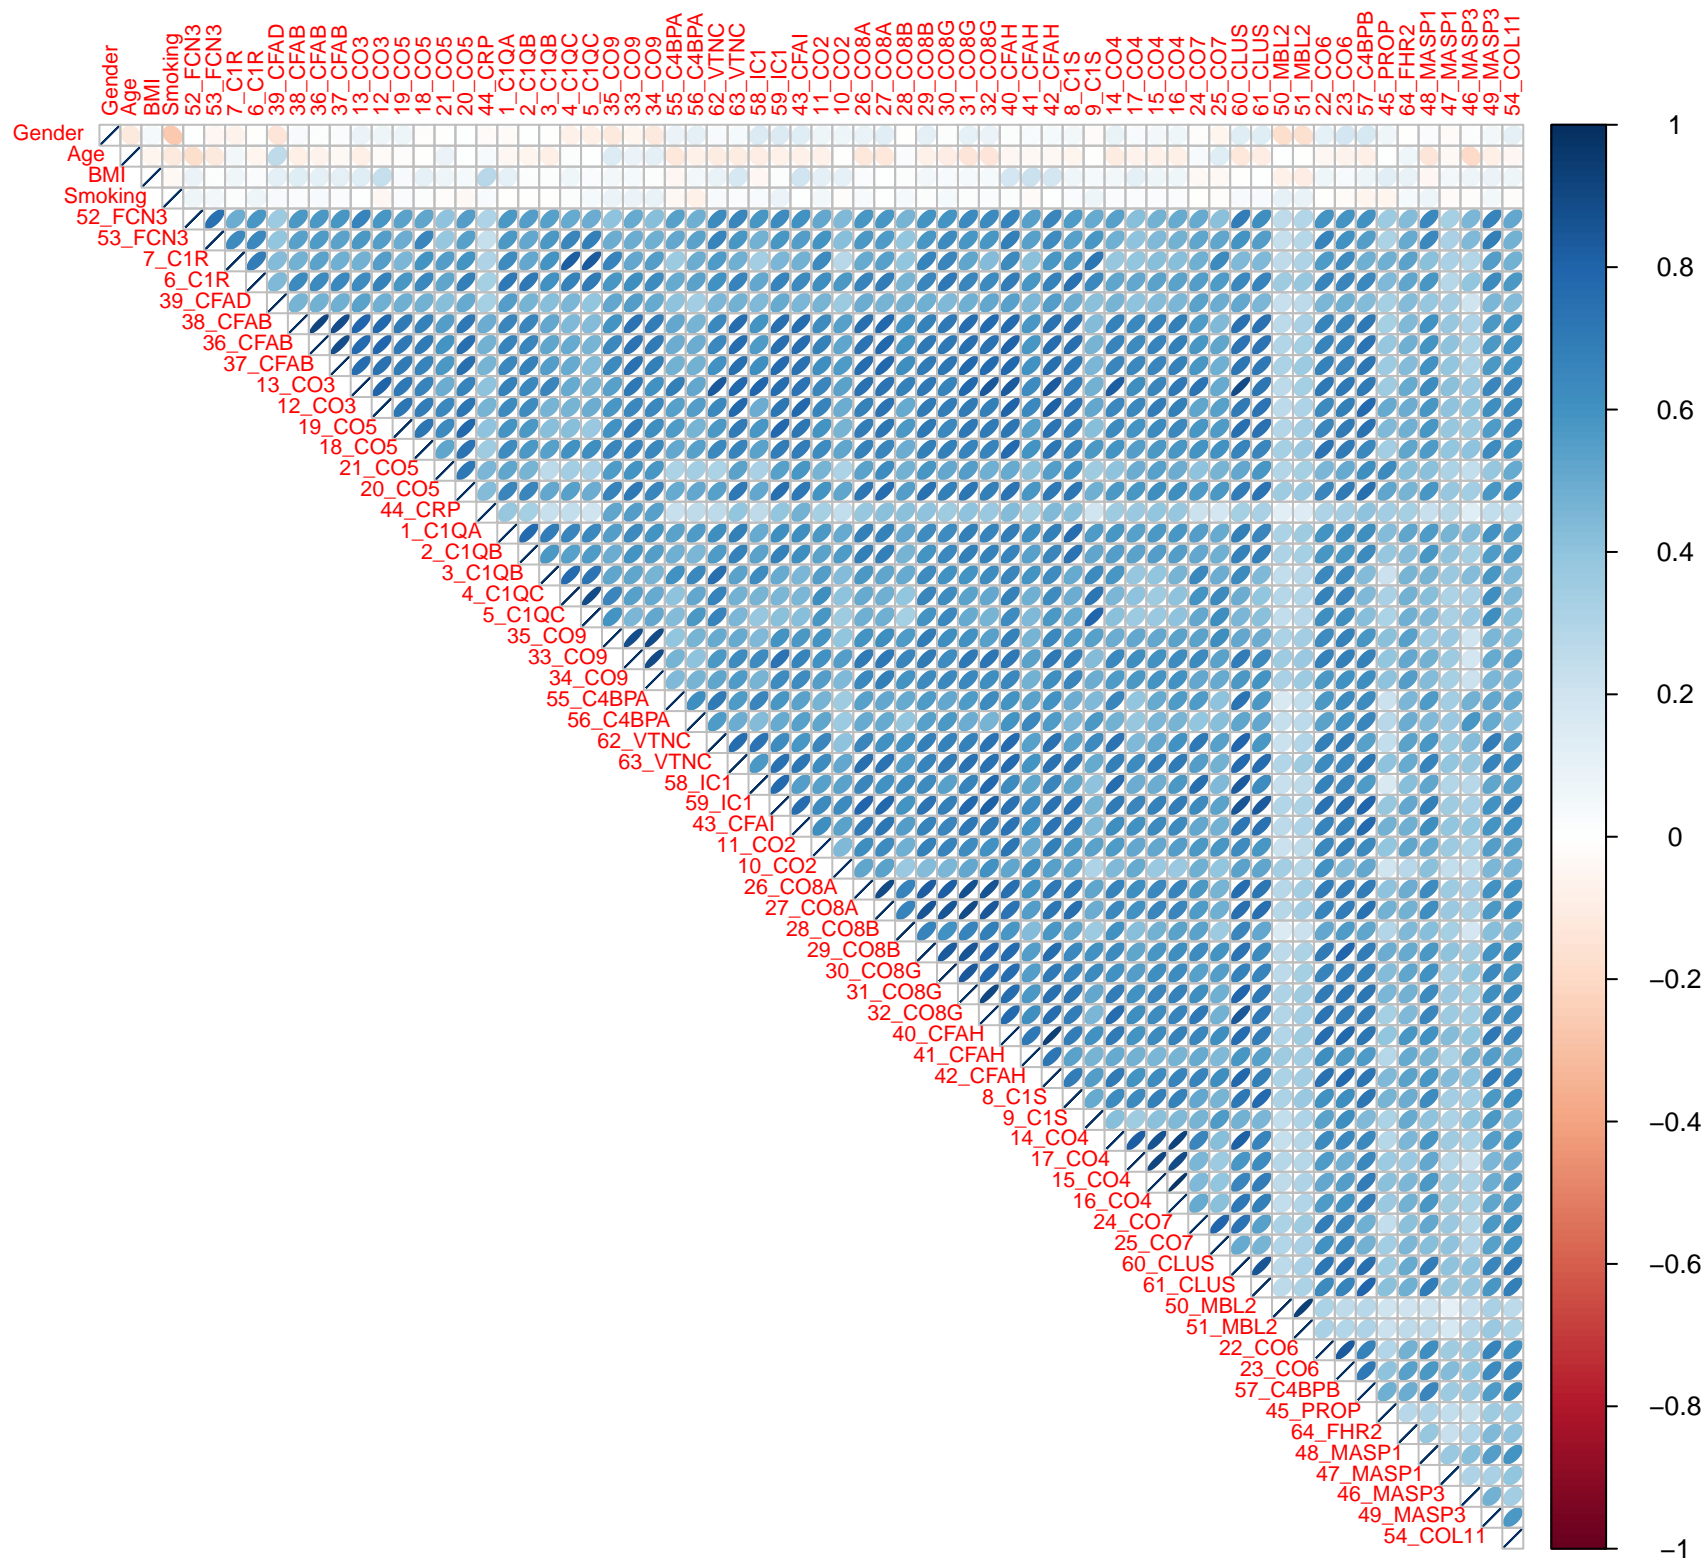

Supplement: s1 [file s1]
